# Supplementary material
Source: Springer Nature journal article supplement (https://www.springermedizin.de/resource/supplementary/12884_2012_748_MOESM1_ESM.pdf/9458126)

Death rates  
(per 1000)

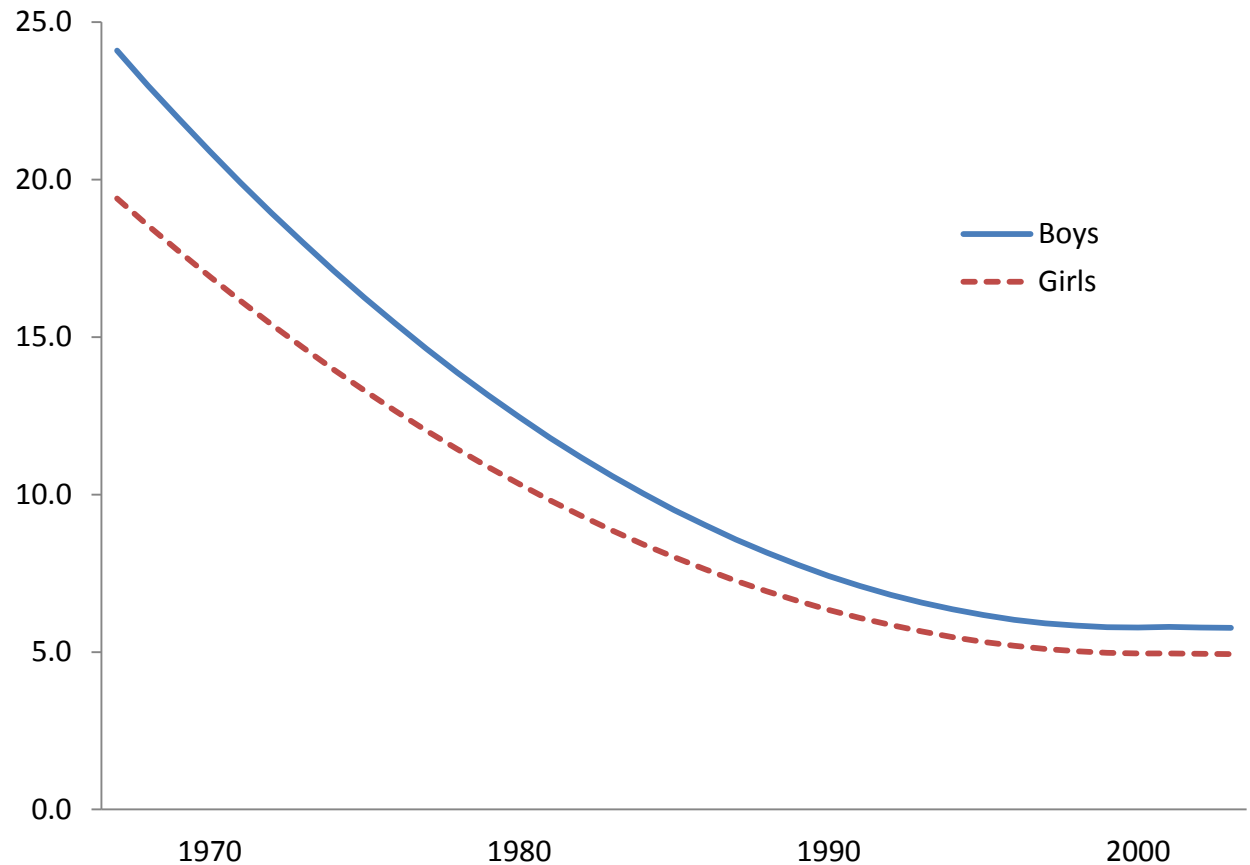

Supplement: MOESM1 [file 9458126]
